# Supplementary material for: Synthesis, structural and metal-to-metal charge transfer properties of cyanide-bridged compound [FeII/III-NC-RuII-CN-FeII/III]
Source: Royal Society of Chemistry journal article supplement (doi:10.1039/d1nj05900a), 2022-01-01
Supplement: d1nj05900a1.pdf [file d1nj05900a1.pdf]

## Supporting Information

### Synthesis, Structural and Metal-to-Metal Charge Transfer

### Properties of Cyanide-Bridged Compound [Fe<sup>II/III</sup>-NC-Ru<sup>II</sup>-CN-Fe<sup>II/III</sup>]

Yong Wang<sup>a\*</sup>

<sup>a</sup> Hubei Key Laboratory of Drug Synthesis and Optimization, Jingchu University of Technology,  
Jinmen, 444800, Hubei, P. R. China

#### EXPERIMENTAL SECTION

##### Materials and syntheses

All manipulations were performed under argon atmosphere with the use of standard Schlenk techniques unless otherwise stated. Dichloromethane was dried by distillation over calcium hydride and diethyl-ether was dried by distillation over sodium wire under argon atmosphere. Methanol was dried by distillation over magnesium under argon atmosphere and acetone was dried by anhydrous Na<sub>2</sub>SO<sub>4</sub>. Ru<sup>II</sup>(DMSO)<sub>4</sub>Cl<sub>2</sub><sup>1,2</sup> (DMSO = dimethyl sulfoxide) was prepared according to the literature procedures. All other reagents were available commercially and used without further purification

##### *trans*-Ru<sup>II</sup>(*t*bu<sub>4</sub>py)<sub>4</sub>(CN)<sub>2</sub>

A mixture of Ru<sup>II</sup>Cl<sub>2</sub>(DMSO)<sub>4</sub> (1000 mg, 2.065 mmol) and 4-*tert*-butylpyridine (10 ml) was stirred magnetically and heated to 130 °C for 30 min. After cooling to room temperature, KCN (1342 mg, 20.65 mmol) in 6 ml of water was added. After refluxing for 3 h, the organic layer was separated from the mixed solution by extract. After hexane (100 ml) was added to the organic

layer, large amount of yellow solid appeared. A yellow precipitate was isolated by filtration and washed with water, 2-propanol and ethyl ether, respectively. After drying in air, the desired yellow product (1088 mg, 67%) was obtained. Anal. Calcd for C<sub>38</sub>H<sub>60</sub>N<sub>6</sub>O<sub>4</sub>Ru: C, 59.58; H, 7.89; N, 10.97%. Found: C, 59.76; H, 7.54; N, 10.92%. IR ( $\nu_{\text{CN}}$ , KBr pellet, cm<sup>-1</sup>): 2058 (s). UV-vis (CH<sub>3</sub>CN),  $\lambda_{\text{max}}$ , nm ( $\epsilon$ , dm<sup>3</sup> mol<sup>-1</sup> cm<sup>-1</sup>): 248 (11652), 374 (22651). MS, m/z: 694.2 [M+H]<sup>+</sup>.

**X-Ray structure determination.** The single crystal data of complexes **1-3** and *trans*-Ru(*tbu*py)<sub>4</sub>(CN)<sub>2</sub> were all collected on a Saturn724+ diffractometer equipped with graphite-monochromatic Mo K $\alpha$  ( $\lambda = 0.71073$  Å) radiation using an  $\omega$ -scan mode at 123 K. Data reduction, scaling and absorption corrections were performed using CrystalClear (Rigaku Inc., 2016). A Multi-scan absorption correction was performed using RIGAKU/MS(C2004), CrystalClear Version 1.3.6. All the structures were solved by the ShelXL-2016/4<sup>3-5</sup> structure solution program using direct methods and refined by full matrix least squares minimisation on  $F^2$  using version 2018/3 of ShelXL 2018/3. All non-hydrogen atoms were refined anisotropically. Hydrogen atom positions were calculated geometrically and refined using the riding model. Hydrogen atom positions were calculated geometrically and refined using the riding model. The  $R$  values are defined as  $R_1 = \Sigma||F_o| - |F_c||/\Sigma|F_o|$  and  $R_2 = [\Sigma[\omega(F_o^2 - F_c^2)^2]/\Sigma[\omega(F_o^2)^2]]^{1/2}$ . The detailed crystal data for complexes **1-3** and *trans*-Ru(*tbu*py)<sub>4</sub>(CN)<sub>2</sub> were summarized in Table S1, and selected bond lengths and angles are presented in Table S2.

CCDC- 1989021 *trans*-Ru(*tbu*py)<sub>4</sub>(CN)<sub>2</sub>, CCDC- 1989022 (**1**), CCDC-1989024(**2**), CCDC-1989023 (**3**) contain the supplementary crystallographic data, related bond lengths and angles for this paper.

**Table S1.** Crystallographic Data and Details of Structure Determination for Complexes **1-3** and *trans*-Ru(*tbu*py)<sub>4</sub>(CN)<sub>2</sub>

| Complex                                                                               | 1·4CH <sub>2</sub> Cl <sub>2</sub>                                                                                     | 2·C <sub>3</sub> H <sub>6</sub> O                                                                      | 3·3C <sub>3</sub> H <sub>6</sub> O·4CH <sub>3</sub> CN                                                                | <i>trans</i> -Ru( <i>tbu</i> py) <sub>4</sub> (CN) <sub>2</sub> ·4H <sub>2</sub> O |
|---------------------------------------------------------------------------------------|------------------------------------------------------------------------------------------------------------------------|--------------------------------------------------------------------------------------------------------|-----------------------------------------------------------------------------------------------------------------------|------------------------------------------------------------------------------------|
| CCDC NO.                                                                              | 1989022                                                                                                                | 1989024                                                                                                | 1989023                                                                                                               | 1989021                                                                            |
| Chemical formula                                                                      | C <sub>104</sub> H <sub>118</sub> Cl <sub>8</sub> F <sub>12</sub> F<br>e <sub>2</sub> N <sub>6</sub> P <sub>6</sub> Ru | C <sub>103</sub> H <sub>116</sub> F <sub>18</sub> Fe <sub>2</sub> N <sub>6</sub><br>OP <sub>7</sub> Ru | C <sub>117</sub> H <sub>140</sub> F <sub>24</sub> Fe <sub>2</sub><br>N <sub>10</sub> O <sub>3</sub> P <sub>8</sub> Ru | C <sub>38</sub> H <sub>60</sub> N <sub>6</sub> O <sub>4</sub> Ru                   |
| Formula weight                                                                        | 2362.23                                                                                                                | 2225.57                                                                                                | 2650.91                                                                                                               | 765.99                                                                             |
| Colour and Habit                                                                      | Red prism                                                                                                              | Red prism                                                                                              | Brown prism                                                                                                           | Orange prism                                                                       |
| Crystal Size / mm                                                                     | 0.48×0.37×0.11                                                                                                         | 0.51×0.33×0.18                                                                                         | 0.49×0.38×0.23                                                                                                        | 0.31×0.15×0.14                                                                     |
| <i>T</i> / K                                                                          | 123                                                                                                                    | 123                                                                                                    | 123                                                                                                                   | 123                                                                                |
| Crystal system                                                                        | Monoclinic                                                                                                             | Monoclinic                                                                                             | Orthorhombic                                                                                                          | Trigonal                                                                           |
| Space group                                                                           | <i>P</i> 2 <sub>1</sub> / <i>c</i>                                                                                     | <i>P</i> 2 <sub>1</sub> / <i>n</i>                                                                     | <i>Pbca</i>                                                                                                           | <i>R</i> -3                                                                        |
| <i>a</i> / Å                                                                          | 13.838(3)                                                                                                              | 13.0216(17)                                                                                            | 28.530(6)                                                                                                             | 25.887(8)                                                                          |
| <i>b</i> / Å                                                                          | 30.951(8)                                                                                                              | 32.214(5)                                                                                              | 26.984(5)                                                                                                             | 25.887(8)                                                                          |
| <i>c</i> / Å                                                                          | 25.870(7)                                                                                                              | 27.028(4)                                                                                              | 34.406(7)                                                                                                             | 15.915(6)                                                                          |
| <i>α</i> / deg                                                                        | 90.00                                                                                                                  | 90.00                                                                                                  | 90.00                                                                                                                 | 90.00                                                                              |
| <i>β</i> / deg                                                                        | 96.100(6)                                                                                                              | 98.184(3)                                                                                              | 90.00                                                                                                                 | 90.00                                                                              |
| <i>γ</i> / deg                                                                        | 90.00                                                                                                                  | 90.00                                                                                                  | 90.00                                                                                                                 | 120.00                                                                             |
| <i>V</i> / Å <sup>3</sup>                                                             | 11017(5)                                                                                                               | 11222(3)                                                                                               | 26487(9)                                                                                                              | 9236(6)                                                                            |
| <i>Z</i>                                                                              | 4                                                                                                                      | 4                                                                                                      | 8                                                                                                                     | 9                                                                                  |
| $\rho_{\text{calcd}}$ (g/cm <sup>3</sup> )                                            | 1.424                                                                                                                  | 1.317                                                                                                  | 1.330                                                                                                                 | 1.239                                                                              |
| $\lambda$ (Mo K $\alpha$ , Å)                                                         | 0.71073                                                                                                                | 0.71073                                                                                                | 0.71073                                                                                                               | 0.71073                                                                            |
| $\mu$ (Mo K $\alpha$ , mm <sup>-1</sup> )                                             | 0.745                                                                                                                  | 0.568                                                                                                  | 0.509                                                                                                                 | 0.428                                                                              |
| Completeness                                                                          | 99.6%                                                                                                                  | 99.6%                                                                                                  | 99.4%                                                                                                                 | 97.9%                                                                              |
| <i>F</i> (000)                                                                        | 4856                                                                                                                   | 4588                                                                                                   | 10944                                                                                                                 | 3654                                                                               |
| <i>h, k, l</i> , range                                                                | -16≤ <i>h</i> ≤15,<br>-36≤ <i>k</i> ≤36,<br>-30≤ <i>l</i> ≤28                                                          | -15≤ <i>h</i> ≤14,<br>-38≤ <i>k</i> ≤37,<br>-32≤ <i>l</i> ≤32                                          | -35≤ <i>h</i> ≤37,<br>-31≤ <i>k</i> ≤35,<br>-44≤ <i>l</i> ≤44                                                         | -33≤ <i>h</i> ≤33,<br>-33≤ <i>k</i> ≤33,<br>-20≤ <i>l</i> ≤20                      |
| $\theta$ range / deg                                                                  | 2.15-25.00                                                                                                             | 2.24-25.00                                                                                             | 2.05-25.00                                                                                                            | 2.72-27.45                                                                         |
| Independent reflections                                                               | 19340                                                                                                                  | 19681                                                                                                  | 30180                                                                                                                 | 4608                                                                               |
| Reflections collected                                                                 | 77510                                                                                                                  | 78718                                                                                                  | 201480                                                                                                                | 36819                                                                              |
| <i>R</i> <sub>int</sub>                                                               | 0.0706                                                                                                                 | 0.0409                                                                                                 | 0.0946                                                                                                                | 0.0663                                                                             |
| Params/restraints/<br>Data(obs.)                                                      | 1180/38/ 19340                                                                                                         | 1504/982/ 19681                                                                                        | 1360/327/30180                                                                                                        | 331/8/4608                                                                         |
| GOF                                                                                   | 1.097                                                                                                                  | 1.048                                                                                                  | 1.038                                                                                                                 | 1.066                                                                              |
| <i>R</i> <sub>1</sub> , $\omega R$ <sub>2</sub> ( <i>I</i> > 2 $\sigma$ ( <i>I</i> )) | 0.0646, 0.1458                                                                                                         | 0.0644, 0.1782                                                                                         | 0.0841, 0.2228                                                                                                        | 0.0376, 0.1016                                                                     |
| <i>R</i> <sub>1</sub> , $\omega R$ <sub>2</sub> (all data)                            | 0.0832, 0.1598                                                                                                         | 0.0738, 0.1886                                                                                         | 0.1038, 0.244                                                                                                         | 0.0389, 0.1035                                                                     |

$$R_1 = \frac{\sum |F_o| - |F_c|}{\sum |F_o|}, \omega R_2 = \left[ \frac{\sum [\omega(F_o^2 - F_c^2)^2]}{\sum [\omega(F_o^2)^2]} \right]^{1/2}.$$

**Table S2.** Selected Bond Lengths (Å) and Bond Angles (deg) for Complexes **1-3**

|           | <b>1</b> | <b>2</b> | <b>3</b> | <i>trans</i> -Ru( <i>t</i> bu <sub>4</sub> py) <sub>4</sub> (CN) <sub>2</sub> |
|-----------|----------|----------|----------|-------------------------------------------------------------------------------|
| Ru1-C1    | 2.036(4) | 2.050(4) | 2.038(4) | 2.061(2)                                                                      |
| Ru1-C2    | 2.042(4) | 1.988(4) | 2.014(4) |                                                                               |
| Ru1-N3    | 2.107(4) | 2.111(3) | 2.106(4) | 2.103(2)                                                                      |
| Ru1-N4    | 2.091(3) | 2.093(3) | 2.115(3) | 2.110(2)                                                                      |
| Ru1-N5    | 2.097(4) | 2.100(4) | 2.112(3) |                                                                               |
| Ru1-N6    | 2.105(4) | 2.112(3) | 2.102(3) |                                                                               |
| C1≡N1     | 1.161(5) | 1.171(5) | 1.155(5) | 1.149(3)                                                                      |
| C2≡N2     | 1.157(5) | 1.176(5) | 1.174(5) |                                                                               |
| Fe1-N1    | 1.937(4) | 1.913(3) | 1.908(4) |                                                                               |
| Fe2-N2    | 1.931(4) | 1.886(3) | 1.896(3) |                                                                               |
| Fe1-P1    | 2.197(1) | 2.203(1) | 2.282(2) |                                                                               |
| Fe1-P2    | 2.204(1) | 2.207(1) | 2.283(2) |                                                                               |
| Fe2-P3    | 2.196(1) | 2.247(1) | 2.266(1) |                                                                               |
| Fe2-P4    | 2.204(1) | 2.250(1) | 2.272(1) |                                                                               |
| C1-Ru1-C2 | 178.6(2) | 177.4(2) | 176.3(2) | 180.0                                                                         |
| N1≡C1-Ru1 | 176.0(4) | 178.8(4) | 174.0(4) | 179.9(2)                                                                      |
| N2≡C2-Ru1 | 176.7(4) | 174.7(4) | 175.8(4) |                                                                               |
| C1≡N1-Fe1 | 173.7(4) | 174.9(4) | 167.0(4) |                                                                               |
| C2≡N2-Fe2 | 173.8(4) | 176.0(3) | 172.8(3) |                                                                               |
| Fe1...Ru1 | 5.121    | 5.135    | 5.047    |                                                                               |
| Fe2...Ru1 | 5.116    | 5.049    | 5.068    |                                                                               |
| Fe1...Fe2 | 10.228   | 10.162   | 10.019   |                                                                               |

**Table S3** Cyanide Stretching Frequencies, Electronic Absorption Spectra and Cyclic-Voltammetry Data for Complex **1-3** and Related Precursors.

| Compound                                                                      | $\nu_{\text{CN}}$ (cm <sup>-1</sup> ) | $\lambda_{\text{max}}$ , nm ( $\epsilon$ , dm <sup>3</sup> mol <sup>-1</sup> cm <sup>-1</sup> ) | <i>P</i> (V)/CH <sub>3</sub> CN | <i>P</i> (V)/CH <sub>2</sub> Cl <sub>2</sub> |
|-------------------------------------------------------------------------------|---------------------------------------|-------------------------------------------------------------------------------------------------|---------------------------------|----------------------------------------------|
| <i>trans</i> -Ru( <i>t</i> bu <sub>4</sub> py) <sub>4</sub> (CN) <sub>2</sub> | 2058                                  | 248 (11652), 374 (22651)                                                                        | 0.62                            |                                              |
| <b>1</b>                                                                      | 2071                                  | 476 (1214)                                                                                      | 0.31, 0.45                      | 0.29, 0.45                                   |
| <b>2</b>                                                                      | 2068, 2011                            | 465 (1468), 957 (2381)                                                                          |                                 |                                              |
| <b>3</b>                                                                      | 2018                                  | 468 (1980), 780 (5573)                                                                          |                                 |                                              |

**Table S4. Mössbauer Parameters for Complexes 1-3**

| Compound        | IS (mm s <sup>-1</sup> ) | QS (mm s <sup>-1</sup> ) |       |
|-----------------|--------------------------|--------------------------|-------|
| <b>1</b> (298K) | 0.371                    | 2.013                    |       |
| <b>2</b> (298K) | 0.364                    | 1.932                    | 34.3% |
|                 | 0.395                    | 0.736                    | 65.7% |

|                |              |              |  |
|----------------|--------------|--------------|--|
| <b>3(298K)</b> | <b>0.517</b> | <b>1.205</b> |  |
| <b>3(10K)</b>  | <b>0.349</b> | <b>0.853</b> |  |

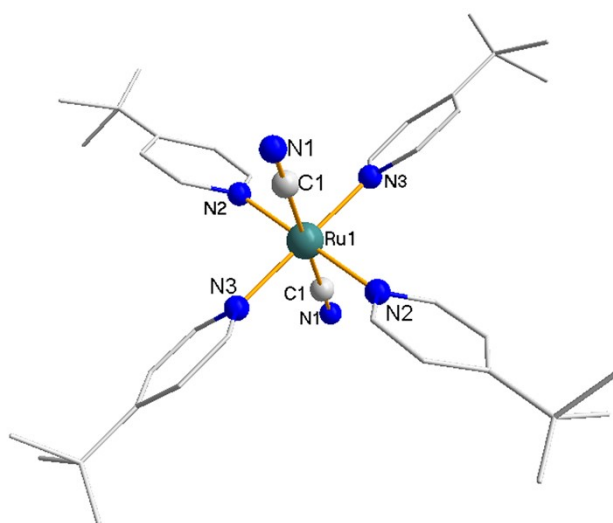

**Figure S1.** Molecular structure of *trans*-Ru(*tbu*py)<sub>4</sub>(CN)<sub>2</sub>, hydrogen atoms and solvent molecules have been removed for clarity.

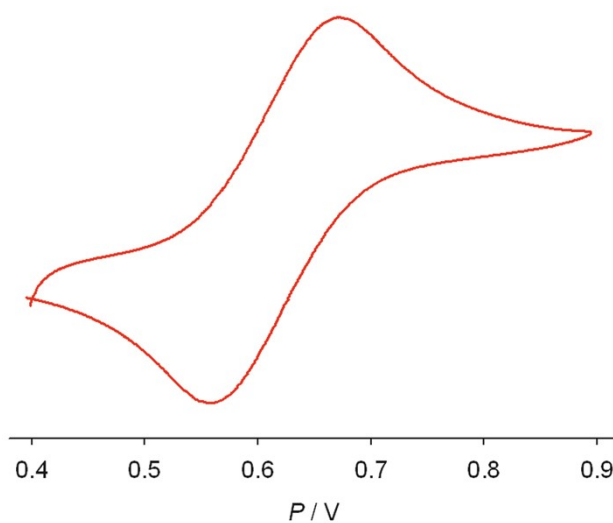

**Figure S2.** Cyclic voltammogram of *trans*-Ru(*tbu*py)<sub>4</sub>(CN)<sub>2</sub> in a 0.10 M acetonitrile solution of [Bu<sub>4</sub>N][PF<sub>6</sub>] at a scan rate of 100 mV s<sup>-1</sup>.

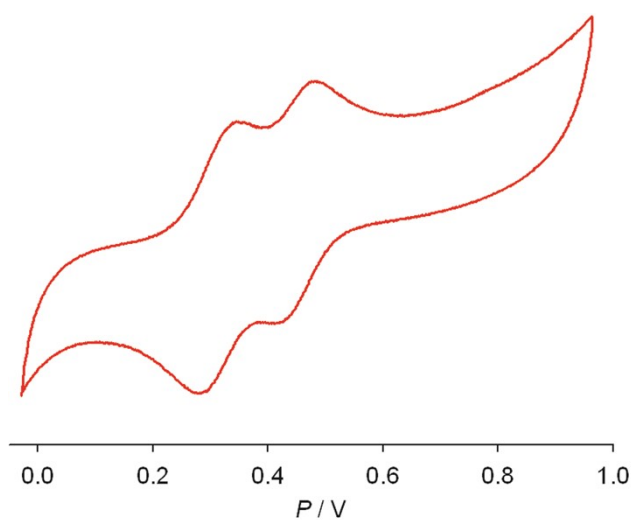

**Figure S3.** Cyclic voltammogram of complex **1** in a 0.10 M acetonitrile solution of  $[\text{Bu}_4\text{N}][\text{PF}_6]$  at a scan rate of  $100 \text{ mV s}^{-1}$ .

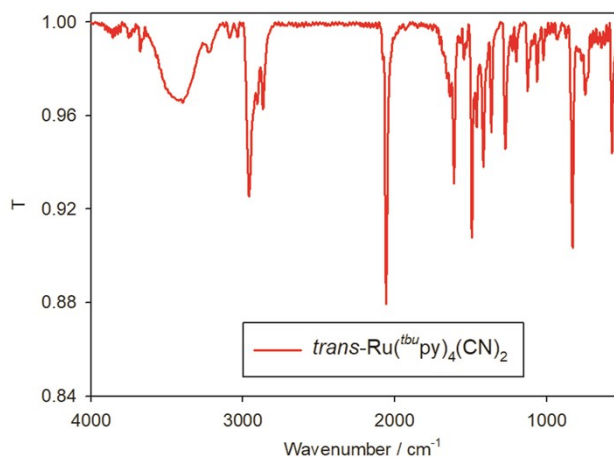

**Figure S4.** IR spectra of complex  $\text{trans-Ru}(\text{tbu py})_4(\text{CN})_2$  in solid-state samples at room temperature. (KBr pellet)

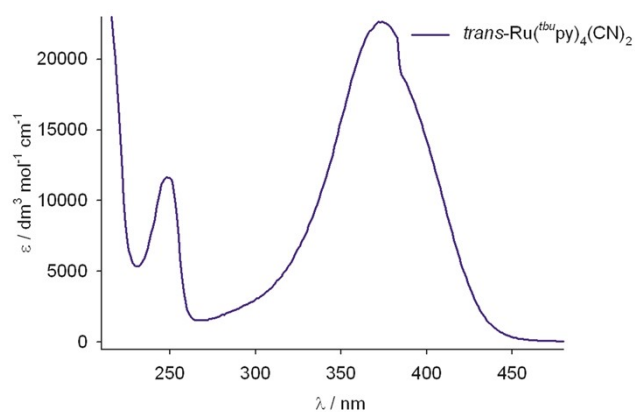

**Figure S5.** Electronic absorption spectra of  $\text{trans-Ru}(\text{tbu py})_4(\text{CN})_2$  in  $\text{CH}_3\text{CN}$  solution at room

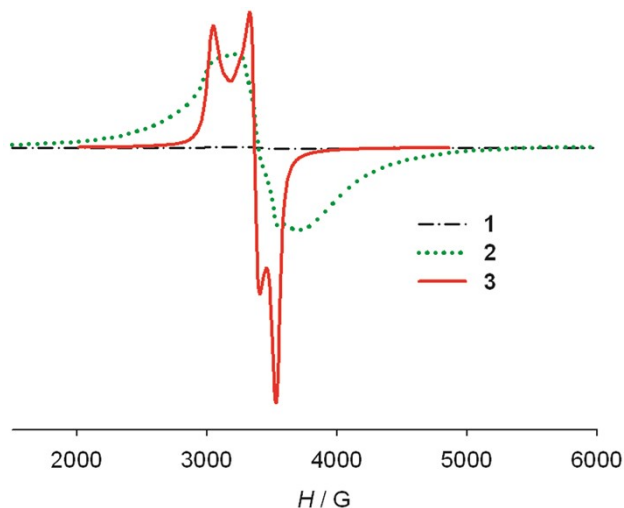

**Figure S6.** EPR spectra of complexes **1-3** in polycrystalline sample at 298K.

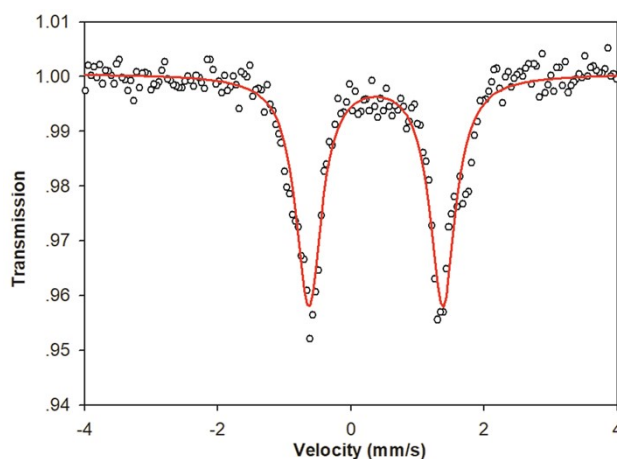

**Figure S7.** Zero field Mössbauer spectra of **1** at 298 K. The solid line represents a best fit. ( $IS = 0.371$  mm/s,  $QS = 2.013$  mm/s)

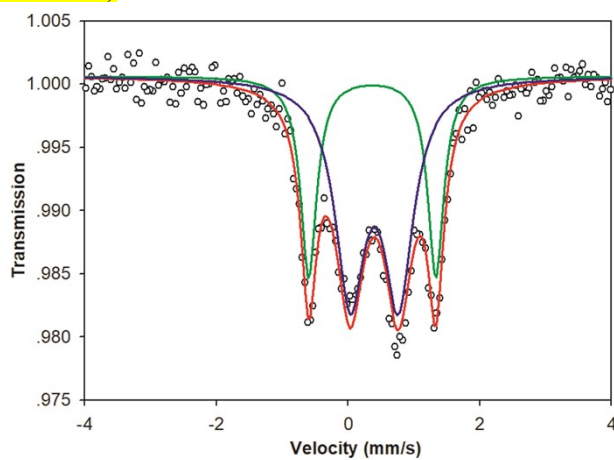

**Figure S8.** Zero field Mössbauer spectra of **2** at 298 K. The red line represents the sum of contributions for all types of Fe in the sample; the blue line is the simulated contribution of low-

spin Fe<sup>III</sup> (IS = 0.395 mm/s, QS = 0.736 mm/s); the green line is the simulated contribution of low-spin Fe<sup>II</sup> (IS = 0.364 mm/s, QS = 1.932 mm/s).

#### Reference

- (1) Canard, G.; Piguet, C. *Inorg. Chem.* **2007**, *46*, 3511.
- (2) Evans, I. P.; Spencer, A.; Wilkinson, G. *J. Chem. Soc., Dalton Trans.* **1973**, *0*, 204.
- (3) Sheldrick, G. M. *Acta Crystallogr. Sect. A* **2008**, *64*, 112.
- (4) Sheldrick, G. M. In *Program for X-ray Crystal Structure Refinement*; University of Göttingen: Germany 2016.
- (5) Sheldrick, G. M. *Acta Crystallogr. Sect. C-Struct. Chem.* **2015**, *71*, 3.
